# Supplementary material for: Ferrocene-based hyperbranched poly(phenyltriazolylcarboxylate)s: synthesis by phenylpropiolate-azide polycycloaddition and use as precursors to nanostructured magnetoceramics
Source: Royal Society of Chemistry journal article supplement (doi:10.1039/c9py01375j), 2019-01-01
Supplement: c9py01375j1.pdf [file c9py01375j1.pdf]

## Electronic Supplementary Information

### Ferrocene-based hyperbranched poly(phenyltriazolylcarboxylate)s: synthesis by phenylpropiolate-azide polycycloaddition and use as precursors to nanostructured magnetoceramics

Jun Du,<sup>a</sup> Wei Yuan,<sup>a</sup> Haoke Zhang,<sup>b</sup> Hongkun Li,<sup>\*a</sup> Yongfang Li<sup>a</sup> and Ben Zhong Tang<sup>b</sup>

<sup>a</sup> State and Local Joint Engineering Laboratory for Novel Functional Polymeric Materials, Laboratory of Advanced Optoelectronic Materials, College of Chemistry, Chemical Engineering and Materials Science, Soochow University, Suzhou 215123, China. E-mail: hkli@suda.edu.cn

<sup>b</sup> Department of Chemistry, Hong Kong Branch of Chinese National Engineering Research Center for Tissue Restoration and Reconstruction, Institute for Advanced Study and Department of Chemical and Biological Engineering, The Hong Kong University of Science & Technology, Clear Water Bay, Kowloon 999077, Hong Kong, China.

#### Table of Contents

**Fig. S1** DSC curves of *hb*-P1–P4 measured under nitrogen at a scanning rate of 2 °C min<sup>-1</sup>.

**Fig. S2** FT-IR spectra of monomers **1a** (A) and **2b** (B) and their polymer *hb*-P2 (C).

**Fig. S3** FT-IR spectra of monomers **1b** (A) and **2a** (B) and their polymer *hb*-P3 (C).

**Fig. S4** FT-IR spectra of monomers **1b** (A) and **2b** (B) and their polymer *hb*-P4 (C).

**Fig. S5** <sup>1</sup>H NMR spectra of monomers **1a** (A) and **2b** (B) and their polymer *hb*-P2 (C) in CDCl<sub>3</sub>.

The solvent and water peaks are marked with asterisks.

**Fig. S6** <sup>1</sup>H NMR spectra of monomers **1b** (A) and **2a** (B) and their polymer *hb*-P3 (C) in CDCl<sub>3</sub>.

The solvent and water peaks are marked with asterisks.

**Fig. S7** <sup>1</sup>H NMR spectra of monomers **1b** (A) and **2b** (B) and their polymer *hb*-P4 (C) in CDCl<sub>3</sub>.

The solvent and water peaks are marked with asterisks.

**Fig. S8** <sup>13</sup>C NMR spectra of monomers **1a** (A) and **2a** (B) and their polymer *hb*-P1 (C) in CDCl<sub>3</sub>.

The solvent peaks are marked with asterisks.

**Fig. S9** <sup>13</sup>C NMR spectra of monomers **1a** (A) and **2b** (B) and their polymer *hb*-P2 (C) in CDCl<sub>3</sub>.

The solvent peaks are marked with asterisks.

**Fig. S10** <sup>13</sup>C NMR spectra of monomers **1b** (A) and **2a** (B) and their polymer *hb*-P3(C) in CDCl<sub>3</sub> .

The solvent peaks are marked with asterisks.

**Fig. S11** <sup>13</sup>C NMR spectra of monomers **1b** (A) and **2b** (B) and their polymer *hb*-P4 (C) in CDCl<sub>3</sub> .

The solvent peaks are marked with asterisks.

**Fig. S12** XRD patterns of C1, C2, C3 and C4.

**Table S1.** Compositions of C1, C2, C3 and C4 estimated by XPS measurements.

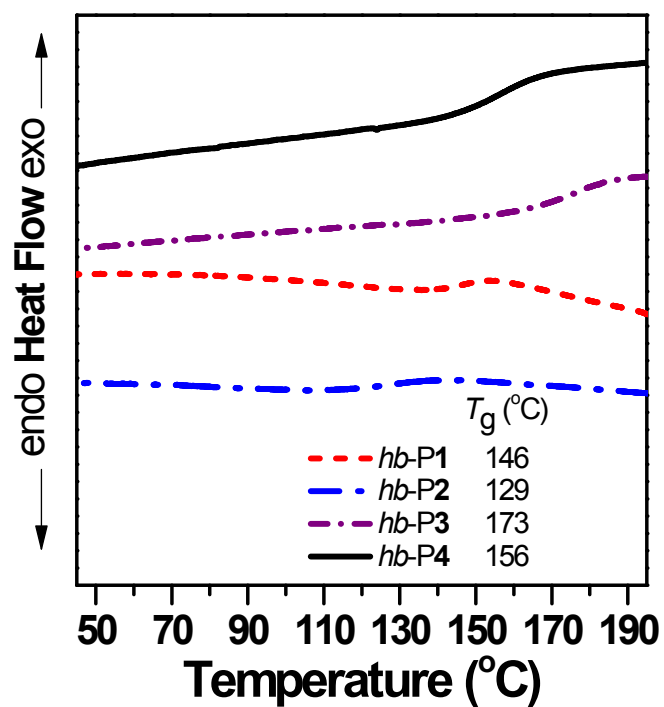

Fig. S1 DSC curves of *hb*-P1–P4 measured under nitrogen at a scanning rate of 2 °C min<sup>-1</sup>.

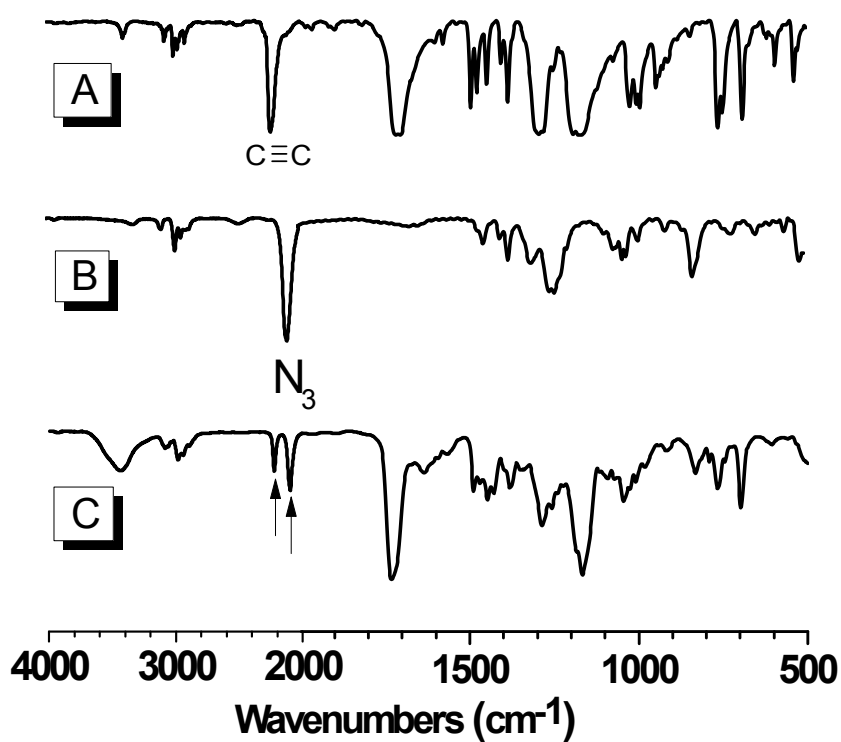

Fig. S2 FT-IR spectra of monomers **1a** (A) and **2b** (B) and their polymer *hb*-P2 (C).

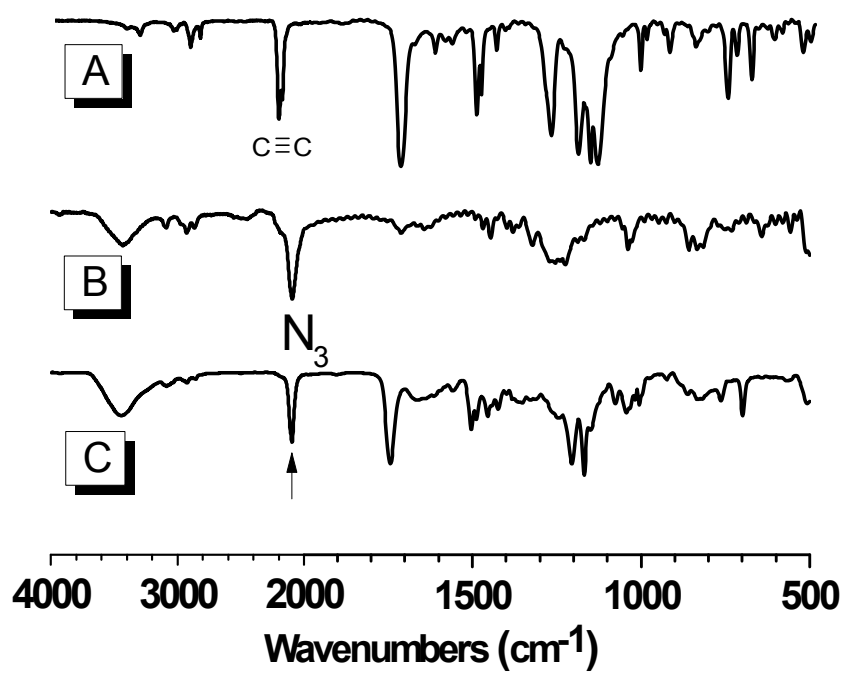

**Fig. S3** FT-IR spectra of monomers **1b** (A) and **2a** (B) and their polymer *hb*-P3 (C).

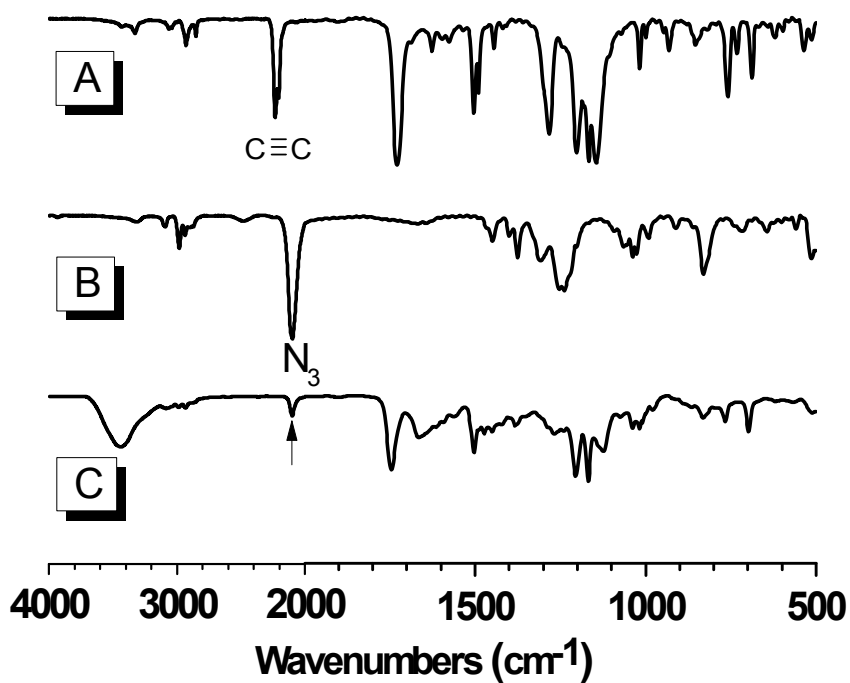

**Fig. S4** FT-IR spectra of monomers **1b** (A) and **2b** (B) and their polymer *hb*-P4 (C).

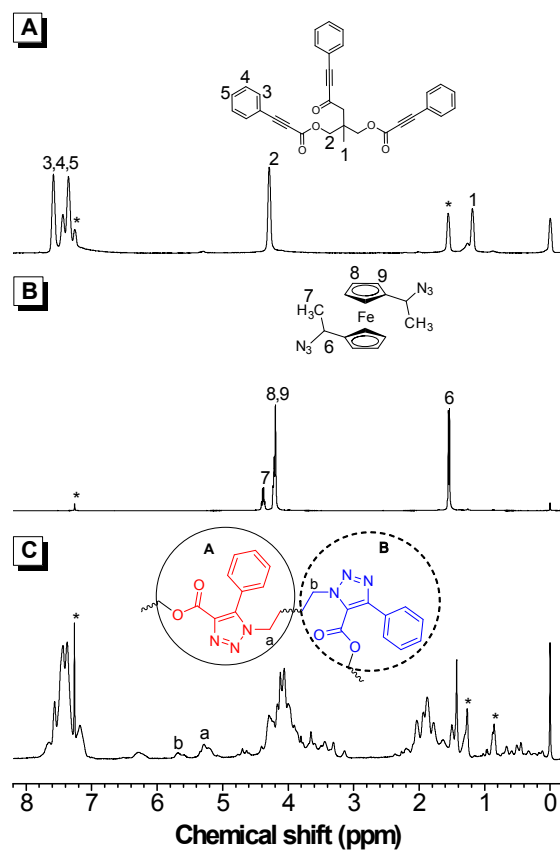

**Fig. S5**  $^1\text{H}$  NMR spectra of monomers **1a** (A) and **2b** (B) and their polymer *hb*-P2 (C) in  $\text{CDCl}_3$ . The solvent and water peaks are marked with asterisks

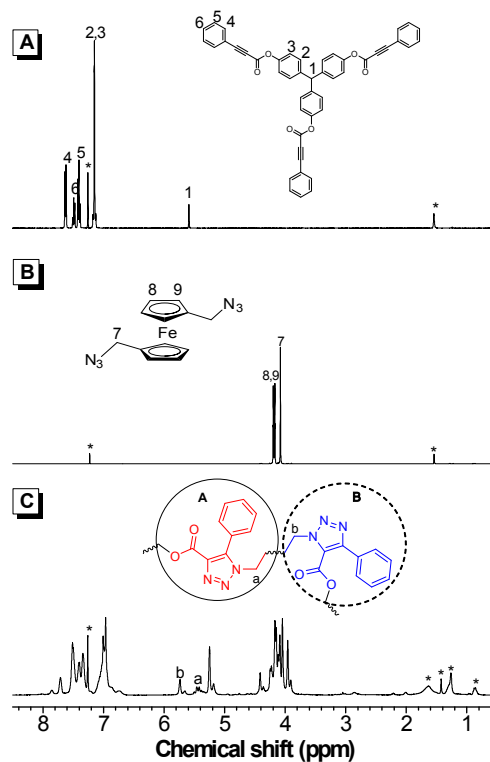

**Fig. S6**  $^1\text{H}$  NMR spectra of monomers **1b** (A) and **2a** (B) and their polymer *hb*-P3 (C) in  $\text{CDCl}_3$ . The solvent and water peaks are marked with asterisks.

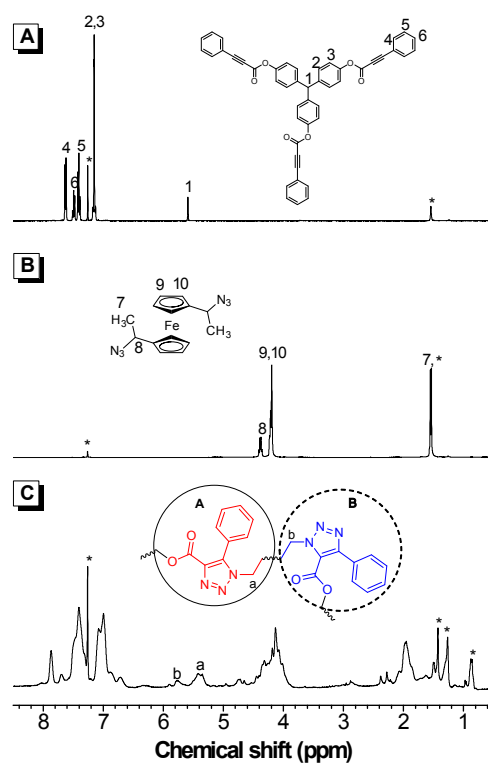

**Fig. S7**  $^1\text{H}$  NMR spectra of monomers **1b** (A) and **2b** (B) and their polymer **hb-P4** (C) in  $\text{CDCl}_3$ . The solvent and water peaks are marked with asterisks

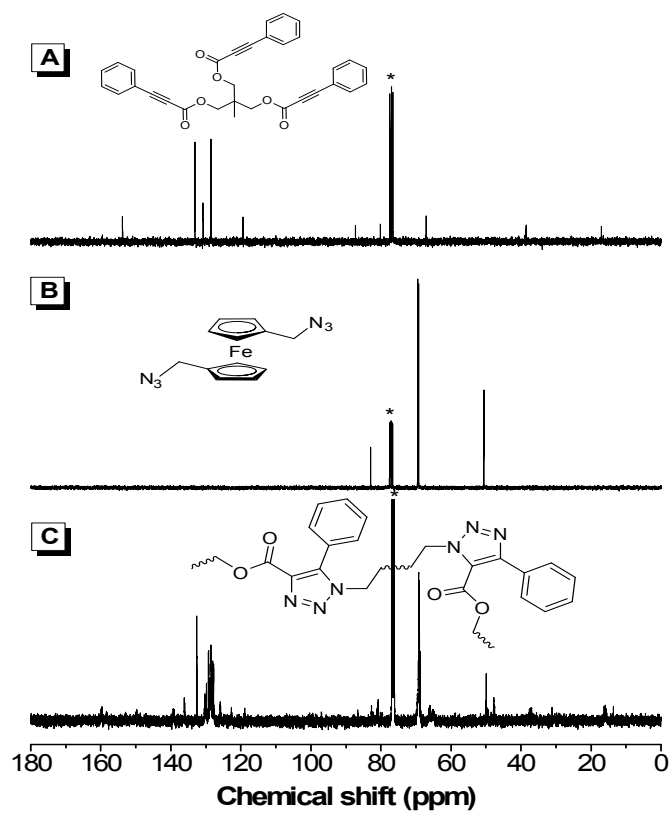

**Fig. S8**  $^{13}\text{C}$  NMR spectra of monomers **1a** (A) and **2a** (B) and their polymer **hb-P1** (C) in  $\text{CDCl}_3$ . The solvent peaks are marked with asterisks.

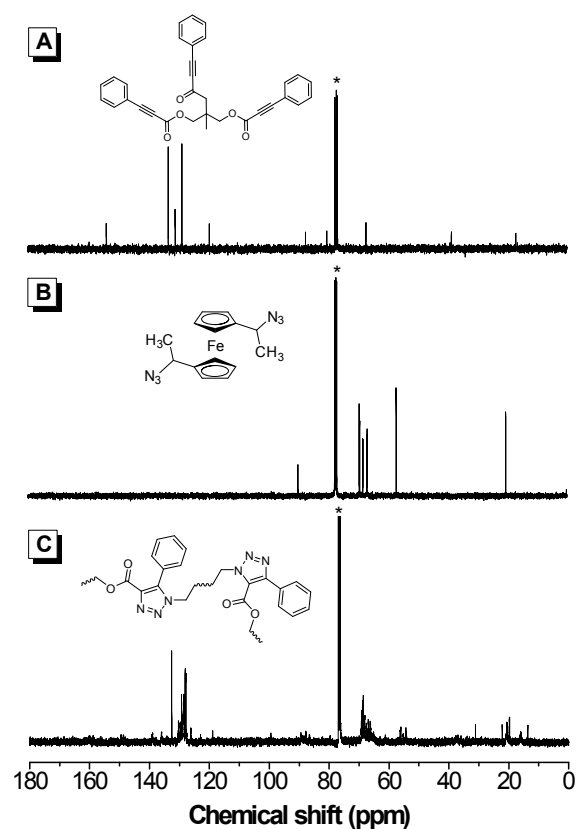

**Fig. S9**  $^{13}\text{C}$  NMR spectra of monomers **1a** (A) and **2b** (B) and their polymer *hb-P2* (C) in  $\text{CDCl}_3$ . The solvent peaks are marked with asterisks.

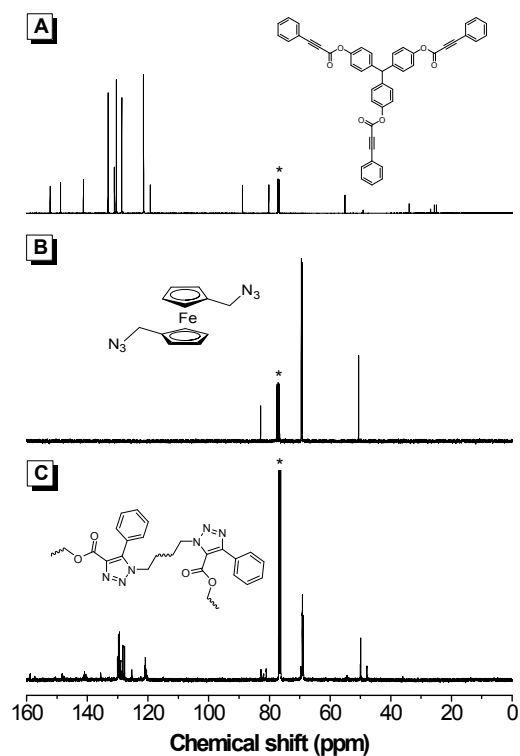

**Fig. S10**  $^{13}\text{C}$  NMR spectra of monomers **1b** (A) and **2a** (B) and their polymer *hb-P3* (C) in  $\text{CDCl}_3$ . The solvent peaks are marked with asterisks.

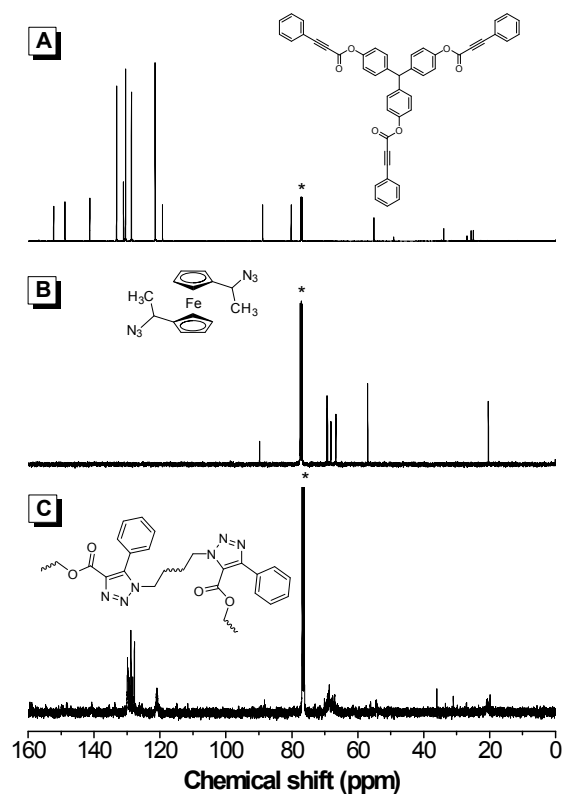

**Fig. S11**  $^{13}\text{C}$  NMR spectra of monomers **1b** (A) and **2b** (B) and their polymer **hb-P4** (C) in  $\text{CDCl}_3$ . The solvent peaks are marked with asterisks.

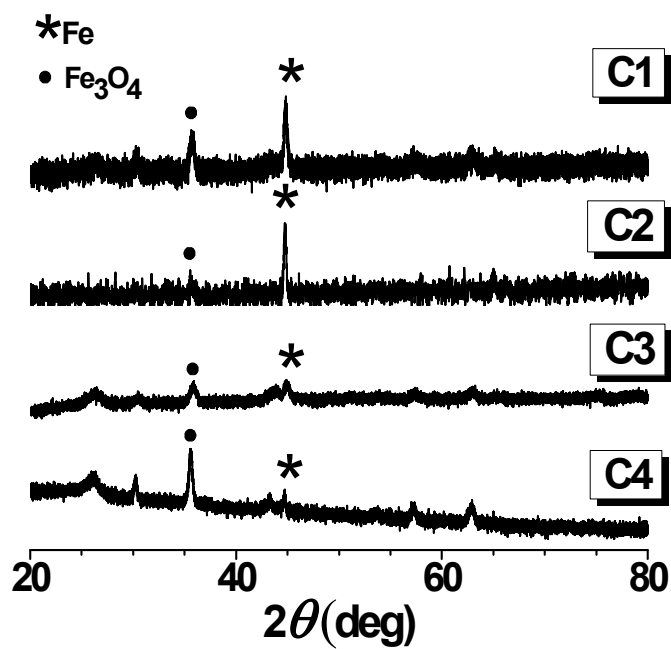

**Fig. S12** XRD patterns of C1, C2, C3 and C4.

**Table S1.** Compositions of C1, C2, C3 and C4 estimated by XPS measurements

| Ceramics | C (%) | O (%) | Fe (%) |
|----------|-------|-------|--------|
| C1       | 93.05 | 4.02  | 2.93   |
| C2       | 94.07 | 2.86  | 3.07   |
| C3       | 93.88 | 4.09  | 2.03   |
| C4       | 93.26 | 4.81  | 1.93   |
